# Supplementary material for: The Potential Role of Metabolomics in Drug-Induced Liver Injury (DILI) Assessment
Source: MDPI journal article supplement (doi:10.3390/metabo12060564), 2022-06-19
Supplement: s1 [file s1]

| Study/Year/Reference        | Drug         | Sample | Confirmation  | Other measurements | N° of patients | Platform             | Up-regulated biomarkers ↑                                                                                                                                                                                                                                                                                                                                                                                                                                                                                                                                                                                                                                                                                                                                                                                        | Down-regulated biomarkers ↓ | Metabolic pathways affected            | Diagnostic/Predictive                                                                                                                                                                      |
|-----------------------------|--------------|--------|---------------|--------------------|----------------|----------------------|------------------------------------------------------------------------------------------------------------------------------------------------------------------------------------------------------------------------------------------------------------------------------------------------------------------------------------------------------------------------------------------------------------------------------------------------------------------------------------------------------------------------------------------------------------------------------------------------------------------------------------------------------------------------------------------------------------------------------------------------------------------------------------------------------------------|-----------------------------|----------------------------------------|--------------------------------------------------------------------------------------------------------------------------------------------------------------------------------------------|
| Andersson et al., 2009 [74] | Ximelagatran | Plasma | ALT>3x ULN    | ALT                | 134            | LC/MS-MS, GC/MS, NMR | <p><u>Putative predisposition biomarkers:</u> L-cysteine, 36:4 PE, Creatinine, Neuraminic acid, DL-<math>\alpha</math>-Aminoadipic acid, Glutamic acid, 1-Linoleoyl-L<math>\alpha</math>-lysophosphatidic acid, Pyruvic acid, 1-Monostearinglycerol, Alanine, 2-Ketoglutaric acid.</p> <p><u>Putative treatment-effect biomarkers:</u> 3-Hydroxy butyrate, pyruvic acid, 18:2/18:1/16:1 TG, L-glutamine, 16:1 CE, 52:5 TG, Vitamin E, 18:2/18:1/18:1 TG, 20:4/18:2/16:0 TG, 18:2/18:1/16:0 TG, 18:2/16:1/16:0 TG, 16:0/16:0 DG, L-Glutamic acid, 53:6 TG, Phenylalanine dimer, L-Phenylalanine, Phenylalanine, 53:4 TG, 18:1 LPC, 18:1/18:1/16:0 TG, 53:3 TG, 18:2/18:1/18:1 TG, Tyrosine, 18:1/18:1/18:1 TG, Tyrosine, 18:1/18:1/16:0 TG, Glutamate, 18:1/18:2 PC, Alanine 18:1/17:1/16:0 TG, Glycine-3TMS.</p> |                             | Pyruvate, amino acid and TG metabolism | Diagnostic and predictive. Identification of a set of putative predisposition biomarkers for ALT elevation after ximelagatran treatment and a set of putative treatment-effect biomarkers. |
| Clayton et al., 2009 [43]   | APAP         | Urine  | Not confirmed | NO                 | 99             | 1H NMR               | p-cresol                                                                                                                                                                                                                                                                                                                                                                                                                                                                                                                                                                                                                                                                                                                                                                                                         |                             | Gut bacteria metabolism                | Predictive. Individuals having high predoses urinary levels of p-cresol sulfate had low postdose urinary                                                                                   |

|                           |                 |       |                                                                                      |                              |     |           |                                                                                                                                                                                  |                                                                                                                                             |                                     |                                                                                                                                                                                                                                          |
|---------------------------|-----------------|-------|--------------------------------------------------------------------------------------|------------------------------|-----|-----------|----------------------------------------------------------------------------------------------------------------------------------------------------------------------------------|---------------------------------------------------------------------------------------------------------------------------------------------|-------------------------------------|------------------------------------------------------------------------------------------------------------------------------------------------------------------------------------------------------------------------------------------|
|                           |                 |       |                                                                                      |                              |     |           |                                                                                                                                                                                  |                                                                                                                                             |                                     | ratios of acetaminophen sulfate to acetaminophen glucuronide, evidencing an impaired sulfur-dependent reactive metabolite detoxification                                                                                                 |
| Fannin et al., 2010 [55]  | APAP            | Serum | Serum ALT levels                                                                     | ALT                          | 9   | NMR       | Lactate                                                                                                                                                                          |                                                                                                                                             | Oxidative phosphorylation           | Diagnostic                                                                                                                                                                                                                               |
| Winnike et al., 2010 [47] | APAP            | Urine | Serum ALT levels                                                                     | ALT                          | 71  | NMR       | Acetaminophen, HIS, glycine, acetaminophen-mercapturate, acetaminophen-cysteine, hydroxyl-isovaleric acid, methyl-histidine, lactate, acetate, hippurate, alanine                | Creatine, creatinine, methyl-histidine, histidine, trimethylamine oxide, betaine, acetaminophen-sulfate, citrate, acetaminophen glucuronide | Glycine and glutathione metabolism  | Predictive. Identification of metabolites important for discriminating responders from nonresponder after acetaminophen dosing but prior to ALT levels                                                                                   |
| Soga et al., 2011 [95]    | Different drugs | Serum | Physical examination, biochemical tests, ultrasonography, CT, MRI and liver biopsies | AST, ALT, GTP, AFP, PIVKA-II | 237 | CE-TOF-MS | $\gamma$ -Glu-Gly, $\gamma$ -Glu-Ala, $\gamma$ -Glu-Ser, $\gamma$ -Glu-Val, $\gamma$ -Glu-Taurine, $\gamma$ -Glu-Leu, $\gamma$ -Glu-Gln, $\gamma$ -Glu-Phe, Methionine sulfoxide | $\gamma$ -Glu-Citrulline unaltered                                                                                                          | GSH metabolism and oxidative stress | Diagnostic. Identification of $\gamma$ -glutamyl dipeptides as biomarkers of liver disease. $\gamma$ -Glu-Citrulline is the only metabolite specific of DILI in comparison with other biomarkers that are altered in all liver diseases. |

|                                 |      |                  |                                                                                         |                                                                         |     |                                |                                                                                                                                                                                           |                                                                                                                   |                                                                                     |                                                                                                                                                                   |
|---------------------------------|------|------------------|-----------------------------------------------------------------------------------------|-------------------------------------------------------------------------|-----|--------------------------------|-------------------------------------------------------------------------------------------------------------------------------------------------------------------------------------------|-------------------------------------------------------------------------------------------------------------------|-------------------------------------------------------------------------------------|-------------------------------------------------------------------------------------------------------------------------------------------------------------------|
| Kim et al., 2013 [77]           | APAP | Urine and Plasma | Standard clinical criteria                                                              | ALT, AST, ALP, T.Bilirubin, $\gamma$ -GTP, lactate dehydrogenase (LDH). | 20  | <sup>1</sup> H NMR             | Urine: 3-chlorotyrosine, phenylalanine and glutarate.<br>Plasma: Lactate, glucose, 3-hydroxyisovalerate, isoleucine, acetylglycine, acetone, acetate, glutamine, ethanol and isobutyrate. | Urine: Citrate, glycine and hippurate                                                                             | Dysfunction of TCA and oxidative phosphorylation and increased anaerobic glycolysis | Diagnostic. Identification of endogenous metabolites in urine and plasma samples related to APAP treatment and altered hepatic function.                          |
| Bhattacharyya et al., 2013 [78] | APAP | Plasma           | Detectable serum APAP, and dosing of APAP $\geq$ 150mg/kg                               | APAP protein adducts, ALT, INR prothrombin time (PT)                    | 272 | UPLC-MS                        | Oleoyl-carnitine, palmitoyl-carnitine, myristoyl-carnitine                                                                                                                                |                                                                                                                   | Acylcarnitines and $\beta$ -oxidation of fatty acids                                | Diagnostic. Identification of increases in the long-chain acylcarnitines in children exposed to APAP in therapeutic doses or overdose.                            |
| McGill et al., 2014 [79]        | APAP | Plasma           | Overdose (ALT $>$ 1,000 U/L and PT $\geq$ 18s), Normal (ALT $<$ 100 U/L and PT $<$ 18s) | Serum APAP levels, ALT, AST, prothrombin time, bilirubin,               | 42  | UPLC-QTOF-MS                   | Unable to identify in humans increased levels of acylcarnitines between groups with a large difference in liver injury, as they do identify in mice                                       |                                                                                                                   | Acylcarnitines not altered                                                          | Diagnostic. Lack of increase in acylcarnitines during APAP hepatotoxicity in humans was due in part to NAC treatment as part of their standard-of-care treatment. |
| Huo et al., 2014 [80]           | VPA  | Serum            | Liver function indicator levels                                                         | ALT, AST, $\gamma$ -GT, ALP. T.Bilirubin, prealbumin.                   | 34  | UPLC-MS and <sup>1</sup> H NMR | Phenylalanine, Uric acid, Leucine, lactate, alanine, acetate, NAC, Acetoacetate, Glutamate, Pyruvate, Choline                                                                             | Creatine, LPC 16:0, PC 16:0/22:6, PC 18:2/18:2, PC 16:0/18:2, LPC 18:0, LPC 18:2, LPC 18:1, LDL/VLDL, citric acid | Glycolysis, lipid metabolism, energy metabolism, amino acid metabolism              | Diagnostic. Metabonomic analysis of VPA induced hepatotoxicity in epileptic patients.                                                                             |

|                                 |                       |        |                                                                                                       |                                                 |    |                                                             |                                                                                                                               |                                          |                                                                                 |                                                                                                                                                       |
|---------------------------------|-----------------------|--------|-------------------------------------------------------------------------------------------------------|-------------------------------------------------|----|-------------------------------------------------------------|-------------------------------------------------------------------------------------------------------------------------------|------------------------------------------|---------------------------------------------------------------------------------|-------------------------------------------------------------------------------------------------------------------------------------------------------|
| Woolbright et al., 2014 [81]    | APAP                  | Serum  | Standard clinical criteria (detectable serum APAP, and/or aminotransferase level of $\geq 1500$ IU/l) | Prothrombin time, ALT, ALP, Bilirubin.          | 84 | UPLC/QTOF-MS                                                | TCA, GCA, GCDCA, TCDCA, TDCA, GDCA                                                                                            |                                          | Bile acid metabolism                                                            | Diagnostic. Suggestion that the increase in serum bile acids may be related to the degree of liver injury, which directly leads to liver dysfunction. |
| James et al., 2015 [82]         | APAP                  | Serum  | APAP overdose based on history ingestion and APAP levels in peripheral blood.                         | Serum APAP levels, APPA protein adducts, ALT.   | 98 | UPLC-triple quadrupole MS                                   | TDCA, GDCA, GCDCA                                                                                                             | Taurocholic acid (TCA), Cholic acid (CA) | Bile acid metabolism                                                            | Diagnostic. Conjugate bile acids associate with toxicity severity in APAP overdose                                                                    |
| Wang et al., 2015 [83]          | Polygonum multiflorum | Plasma | International codified criteria                                                                       | Heavy metals, pesticides and mycotoxins         | 44 | LC-QTOF-MS                                                  | LysoPC(18:2), Farnesyl pyrophosphate, Oleoyl glycine, trans-Dodec-2-enoic acid, 20-Hydroxy-PGF2a, LysoPC(16:1), PC(24:0/22:0) |                                          | Lysophosphatidylcholines, phosphatidylcholines, prostaglandins and fatty acids. | Diagnostic. Differential diagnosis from other liver diseases such as AIH and HBV.                                                                     |
| Bhattacharyya et al., 2016 [84] | APAP                  | Serum  | Overdose: APAP > 150mg/kg and high APAP concentrations in peripheral                                  | ALT, INR prothrombin time, APAP-protein adducts | 43 | Absolutel DQ® p180 platform from Biocrates Life Sciences AG | PCs and LPCs with comparatively short chain lengths, linked PCs, LPC-C26:1                                                    | PCs and LPCs with VLCFAs                 | Phospholipid metabolism                                                         | Diagnostic. Identification of significant changes in PCs and lysoPCs with VLCFAs between therapeutic, control and overdose group.                     |

|                                    |                                                                            |       |                                 |                               |    |                             |                                                                                                                                                                                                          |                                                                                                                                                                                                                                                                                                                                                                                                                     |                                                                                                                                                                                    |                                                                                                                                                                             |
|------------------------------------|----------------------------------------------------------------------------|-------|---------------------------------|-------------------------------|----|-----------------------------|----------------------------------------------------------------------------------------------------------------------------------------------------------------------------------------------------------|---------------------------------------------------------------------------------------------------------------------------------------------------------------------------------------------------------------------------------------------------------------------------------------------------------------------------------------------------------------------------------------------------------------------|------------------------------------------------------------------------------------------------------------------------------------------------------------------------------------|-----------------------------------------------------------------------------------------------------------------------------------------------------------------------------|
|                                    |                                                                            |       | ral<br>blood                    |                               |    |                             |                                                                                                                                                                                                          |                                                                                                                                                                                                                                                                                                                                                                                                                     |                                                                                                                                                                                    |                                                                                                                                                                             |
| Schnackenberg<br>et al., 2017 [85] | APAP                                                                       | Urine | Publish<br>ed<br>guidelin<br>es | ALT                           | 19 | UPLC/QT<br>OF-MS<br>and NMR | 2-Oxoarginine, ascorbic acid,<br>alanine, choline, fructose,<br>glucose, hippurate, indoxyl,<br>lactate, propylene glycol,<br>pyruvate, taurocholic acid isomer,<br>trimethyl N-oxide, uracil, uric acid | Citrulline, Cresol,<br>Hydroxybutyrylcarnitine,<br>Proline                                                                                                                                                                                                                                                                                                                                                          | Arginine and<br>proline<br>metabolism, TCA<br>cycle, taurine and<br>hypotaurine<br>metabolism,<br>glycine, serine and<br>threonine<br>metabolism, and<br>glutathione<br>metabolism | Diagnostic.<br>Identification of<br>metabolic<br>pathways altered<br>after APAP<br>overdose                                                                                 |
| Lee et al., 2017<br>[86]           | Amoxicillin/clavu<br>lanate                                                | Urine | ALT<br>levels                   | ALT, AST, ALP,<br>T.Bilirubin | 31 | UPLC--<br>QTOF-MS           | 7-Methylxanthine, 3-<br>Methylxanthine, 7-Methyluric<br>acid                                                                                                                                             | Azelaic acid                                                                                                                                                                                                                                                                                                                                                                                                        | Mitochondrial<br>oxidative stress                                                                                                                                                  | Diagnostic.<br>Identification of<br>metabolomic<br>signatures of<br>amoxicillin/clavu<br>lanate exposure<br>in healthy<br>volunteers as<br>predictors of AC-<br>DILI.       |
| Cao et al., 2018<br>[87]           | Isoniazid,<br>Rifampicin,<br>Ethambutol,<br>Pyrazinamide<br>(HRZE regimen) | Urine | ALT>40<br>U/L                   | T. Bilirubin, ALT,<br>AST     | 77 | HPLC-<br>LTQ-MS             | Uric acid, 3-Furoic acid, 7-Cyano-<br>7-deazaguanine, Sebacic acid, l-<br>Methyl-4-nitro-imidazole,<br>Mesaconic acid, cis-4-octenedioic<br>acid, l-met, D-Mannitol.                                     | Hypoxanthine, 3-Hydroxy-<br>3-methyl-Glutaric acid,<br>Isobutyrylglycine,<br>Pyrazineethanethiol, 2-<br>Hydroxypropylphosphonat<br>e, p-Hydroxyphenylacetic<br>acid, Gluconolactone,<br>Indoxylsulfuric acid,<br>Citramalic acid, Creatinine,<br>L-Erythrulose,<br>Orotinichalcone,<br>Queuosine, N-<br>acetylaspartate, cis-<br>Aconitic acid, Urea,<br>Myriganone E, Glabrone,<br>alpha-hydroxyisovaleric<br>acid | Purine<br>metabolism,<br>arginine and<br>proline<br>metabolism, TCA<br>cycle, pentose<br>phosphate<br>pathway.                                                                     | Diagnostic.<br>Identification of<br>metabolites<br>significantly<br>increased in the<br>DILI group<br>compared to<br>those in the non-<br>DILI group after<br>HRZE regimen. |

|                         |                                                                                                                                                                                      |       |                                                                 |                                       |    |                       |                                                                                                                                                                                                                                                                                                                                                                    |                                                                                                                                                                                                                                                                                                   |                                                                                                                                |                                                                                                               |
|-------------------------|--------------------------------------------------------------------------------------------------------------------------------------------------------------------------------------|-------|-----------------------------------------------------------------|---------------------------------------|----|-----------------------|--------------------------------------------------------------------------------------------------------------------------------------------------------------------------------------------------------------------------------------------------------------------------------------------------------------------------------------------------------------------|---------------------------------------------------------------------------------------------------------------------------------------------------------------------------------------------------------------------------------------------------------------------------------------------------|--------------------------------------------------------------------------------------------------------------------------------|---------------------------------------------------------------------------------------------------------------|
| Ma et al., 2019 [88]    | Tradicional chinese medicine, Analgesic-antipyretic drugs, Antituberculosis drugs, Antibiotic drugs, Lipid-lowering drugs, Tibetan medicine, Healthcare products, Unknown medication | Serum | ALT>40 U/L and T.Bilirubin> 20µmol/L                            | ALT, ALP, T.Bilirubin, INR            | 68 | UHPLC-LTQ-Orbitrap-MS | DILI vs control: Palmitic acid, TCDCA, GCA and TUDCA. Severe vs mild DILI: GCA, TCA, TUDCA, GCDCA, GCDGS, TDCA.                                                                                                                                                                                                                                                    | DILI vs control: LPE<br>Severe vs mild DILI: CDCA, DCA and LCA.                                                                                                                                                                                                                                   | Bile acid metabolism                                                                                                           | Diagnostic. Identification of bile acids as biomarkers for the early diagnosis and severity of DILI           |
| Xie et al., 2019 [89]   | DILI patients                                                                                                                                                                        | Serum | Clinical evaluation                                             | ALT, AST, ASP, T. Bilirubin, INR, K18 | 90 | UPLC-MS/GC-MS         | Severe vs non-severe: iminodiacetic acid, glucuronic acid, GCDCA, TCDCA, biliverdin, SM(d18:1/14:0), SM(d18:0/16:1)                                                                                                                                                                                                                                                | Severe vs non-severe: gluconic lactone, D-(glycerol 1-phosphate), uric acid, terephthalic acid, 3,4-dihydroxyphenylglycol, xanthosine, leucine, tartaric acid, N-methyl-L-glutamic acid, linoleic acid, cholesterol, maltose, sodium glycocholate, PC (22:6/16:0), PC (16:1;18:2), PC (18:0/20:3) | Primary bile acid biosynthesis, alpha-linolenic acid metabolism, glycerophospholipid metabolism, starch and sucrose metabolism | Diagnosis. Identification of metabolites related to the severity of idiosyncratic DILI                        |
| Zhang et al., 2020 [75] | Polygonum multiflorum                                                                                                                                                                | Serum | ALT levels. Susceptible group ALT>ULN, tolerant group ALT<1 ULN | ALT, AST, ALP, T.Bilirubin.           | 36 | UPLC-Q-TOF-MS/MS      | Glyceric acid, L-glutamate, Oxalosuccinic acid, PC 22:6, Acylglycerone phosphate, Indole-5,6-quinone, Gentisate aldehyde, Precorrin 6Y, 2E- tetradecenoyl-CoA, Ceramide, 3-Indolylactic acid, Crotonoyl-CoA, LysoPC 20:4, Stearic acid, PE 22:6, Precorrin 8X, Kynurenic acid, 4-Hydroxyphenylacetate, Glutaric acid, Phenyllactic acid, L-Tyrosine, L-Histidinol. | Phosphoribosyl-ATP                                                                                                                                                                                                                                                                                | Sphingolipid, glycerophospholipid, fatty acid, histidine and aromatic amonio acid metabolism.                                  | Predictive. Characterization of metabolic profile of idiosyncratic DILI risk individuals before PM ingestion. |

|                         |                                                                                                                                |        |                                 |                                    |    |              |                                                                                                                                                                                                                                                                                                                                                                                                                                                                                                                                                                                  |                                                                                                                                                                                                                                                                                                                  |                                                                                                                                                                                                                                                                                      |                                                                                                                                                                                                                                                      |
|-------------------------|--------------------------------------------------------------------------------------------------------------------------------|--------|---------------------------------|------------------------------------|----|--------------|----------------------------------------------------------------------------------------------------------------------------------------------------------------------------------------------------------------------------------------------------------------------------------------------------------------------------------------------------------------------------------------------------------------------------------------------------------------------------------------------------------------------------------------------------------------------------------|------------------------------------------------------------------------------------------------------------------------------------------------------------------------------------------------------------------------------------------------------------------------------------------------------------------|--------------------------------------------------------------------------------------------------------------------------------------------------------------------------------------------------------------------------------------------------------------------------------------|------------------------------------------------------------------------------------------------------------------------------------------------------------------------------------------------------------------------------------------------------|
| Saito et al., 2020 [90] | Suspected drugs: antibacterial agents, antineoplastic agents, anti-inflammatory and antirheumatic products, and psycholeptics. | Plasma | Clinical evaluation             | AST, ALT, ALP, T.Bilirubin         | 54 | LC-MS        | <p>Acute Mixed-type DILI vs Recovery Phase: Cer d34:1, Cer d36:1, and GM3 d34:1.</p> <p>Si comparamos acute phase mixed-type DILI with healthy subjects, 6 lipids were significantly different{LPC(18:2), LPC(16:1e), PE(38:6e), Cer(d34:1), Cer(d36:1)and GM+O(d34:1).</p> <p>Acute cholestatic-type DILI vs recovery phase: PC 30:0, PC 31:0, PC 32:1, PC 33:1.</p>                                                                                                                                                                                                            | <p>Acute mixed -type DILI vs recovery phase: LPC 18:2, LPC16:1e, PC 38:6e, PE 36:4e, PE 38:4e, PE 38:6e.</p> <p>Acute cholestatic type-DILI vs recovery phase: PC 36:5e, PC 38:6e, PE36:4e, PE 38:4e, PE 40:6e, PE 40:7e, PI 38:3, PI 38:4, PI 40:4, CerG3 d40:1, CerG3 d42:1, SM d40:1, TG 44:0, and CoQ10.</p> | Lipid metabolism                                                                                                                                                                                                                                                                     | <p>Diagnostic. Identification of lipids with a relatively high capacity to discriminate the acute phase from the recovery phase and healthy subjects. The direction of the changes of the ones compared with healthy subjects are not mentioned.</p> |
| Huang et al., 2020 [91] | Polygonum multiflorum                                                                                                          | Plasma | International codified criteria | IgG, IgM, Bilirubin, ALT, AST, ALP | 58 | UPLC-QTOF-MS | <p>4-Cresol, Phenylalanine, P-cresol sulfate, Oxalosuccinic acid, D-Glucuronic acid, Deoxyribose 5-phosphate, Melatonin, Inosine, PA(17:2(9Z,12Z)/0:0)a, (25S)-5<math>\beta</math>-cholestane-3<math>\alpha</math>, 7<math>\alpha</math>, 12<math>\alpha</math>, 26-tetrol, Glycochenodeoxycholate, Lyso PE (0:0/22:6(4Z, 7Z, 10Z, 13Z, 16Z, 19Z))b, Taurocholate, PA(14:1(9Z)/13:0)c, PG (14:1(9Z)/18:3(6Z,9Z,12Z))d, CoA, Valine, Methionine, Phenylalanine, Coniferyl aldehyde, Tyrosine, Phytosphingosine, PE (17:2(9Z, 12Z)/0:0)e, Bilirubin, DG(17:2(9Z,12Z)/20:0/0:0)</p> |                                                                                                                                                                                                                                                                                                                  | <p>Disturbances in some metabolic pathways, such as the metabolism of three essential amino acids (i.e., tryptophan, valine, phenylalanine), glycerophospholipid metabolism, primary bile acid biosynthesis, and sphingolipid metabolism may specifically contribute to PM-DILI.</p> | <p>Diagnosis. The ratios P-cresol sulfate vs phenylalanine and Inosine vs Bilirubin are the best discriminating in the differentiation of PM-DILI from HBV and AIH.</p>                                                                              |

|                        |                                                                           |       |                                     |                                                                                                                                                                                                                                                                        |    |            |                                                                                                                                                                                                                                                                                                                                                                                                                                                                                                                                                                                                                                                                                                                                                                                                                                                                                                                                                                                                                                                                                                                                                                               |                                                                                                                                                                                                                                                           |                                                                                                                                                                                           |                                                                                                                                          |
|------------------------|---------------------------------------------------------------------------|-------|-------------------------------------|------------------------------------------------------------------------------------------------------------------------------------------------------------------------------------------------------------------------------------------------------------------------|----|------------|-------------------------------------------------------------------------------------------------------------------------------------------------------------------------------------------------------------------------------------------------------------------------------------------------------------------------------------------------------------------------------------------------------------------------------------------------------------------------------------------------------------------------------------------------------------------------------------------------------------------------------------------------------------------------------------------------------------------------------------------------------------------------------------------------------------------------------------------------------------------------------------------------------------------------------------------------------------------------------------------------------------------------------------------------------------------------------------------------------------------------------------------------------------------------------|-----------------------------------------------------------------------------------------------------------------------------------------------------------------------------------------------------------------------------------------------------------|-------------------------------------------------------------------------------------------------------------------------------------------------------------------------------------------|------------------------------------------------------------------------------------------------------------------------------------------|
| Chen et al., 2021 [92] | Herbal and traditional medicine, chemical drugs and combined used of both | Serum | DILI and liver cirrhosis guidelines | ALT, ASP, ALP, T. Bilirubin, Direct Bilirubin, Total bile acid, INR, $\gamma$ -glutamyl transpeptidase, cholinesterase, total cholesterol, triglyceride, creatinine, IgA, IgG, IgM, white blood cells, platelet, albumin, globulin, albumin/globulin ratio, prealbumin | 83 | LC-QTOF-MS | <p><b>Cirrhosis vs non cirrhosis:</b> Salpha-Androstan-3<math>\beta</math>,17<math>\alpha</math>-diol disulfate,2-(3-Carboxy-3-oxopropyl)-L-histidine,3-Methoxyanthranilate,Taurochenodesoxycholic acid, L-Phenylalanine, Tuftsine, D-Xylulose, Citric acid, Beta-Citryl-L-glutamic acid, 9-Hydroxypalmitic acid, 3-keto stearic acid, Glycocholic acid, PC(22:6/18:3), Chenodeoxycholic acid glycine conjugate, Propionic acid, SM(d18:0/16:1(OH)), PC(14:0/20:0),3-Hydroxyanthranilic acid, (all-Z)-8,11,14-Heptadecatrienal, N(omega)-Hydroxyarginine, 5-Methyltetrahydrofolic acid, N1-Acetylspermidine, Indolepyruvate, L-Arginine, Dihydrouracil, Tryptophyl-Glutamate, Cysteinyl-Proline, Enol-phenylpyruvate, Indoleacetaldehyde, 7-Methylguanine.</p> <p><b>Decompensated vs compensated:</b> Isopropylmaleate, Benzoquinoneacetic acid, Quinolinic acid, 2-Hydroxyglutarate, PE(22:2/18:3), PA(20:5/22:6), Glucosylceramide (d18:1/26:1), 3-Carboxy-1-hydroxypropylthia diphosphate, UDP-L-rhamnose,Topoquinone,2-Hydroxyphytanoyl-CoA, Selenocysteine, SM(d18:0/22:2), Bilirubin diglucuronide, Menatetrenone, Menaquinol, 3-Polyprenyl-4,5-dihydroxybenzoate.</p> | <p><b>Decompensated vs compensated:</b> PS(18:0/22:6),2-hydroxy-2-(4-hydroxy-3-methoxyphenyl)acetic acid, PC(14:0/20:0), L-Proline, Trypanothione disulfide, Trihexosylceramide, 3-O-Sulfogalactosylceramide(d18:1/12:0), Phosphodimethylethanolamine</p> | Phenylalanine and tyrosine metabolism, tryptophan metabolism, arginine and proline metabolism, TCA cycle, ubiquinone and other terpenoid-quinone biosynthesis, and bile acid biosynthesis | Diagnosis. Identification of metabolic fingerprints associated with DILI cirrhosis (30 metabolites) and decompensation (25 metabolites). |
|------------------------|---------------------------------------------------------------------------|-------|-------------------------------------|------------------------------------------------------------------------------------------------------------------------------------------------------------------------------------------------------------------------------------------------------------------------|----|------------|-------------------------------------------------------------------------------------------------------------------------------------------------------------------------------------------------------------------------------------------------------------------------------------------------------------------------------------------------------------------------------------------------------------------------------------------------------------------------------------------------------------------------------------------------------------------------------------------------------------------------------------------------------------------------------------------------------------------------------------------------------------------------------------------------------------------------------------------------------------------------------------------------------------------------------------------------------------------------------------------------------------------------------------------------------------------------------------------------------------------------------------------------------------------------------|-----------------------------------------------------------------------------------------------------------------------------------------------------------------------------------------------------------------------------------------------------------|-------------------------------------------------------------------------------------------------------------------------------------------------------------------------------------------|------------------------------------------------------------------------------------------------------------------------------------------|



|                           |                                                                                                       |       |                                                         |                                                                                                                     |     |            |                                                                                                                                                                                                                                                                       |  |                                                                          |                                                                                                                                                                                                        |
|---------------------------|-------------------------------------------------------------------------------------------------------|-------|---------------------------------------------------------|---------------------------------------------------------------------------------------------------------------------|-----|------------|-----------------------------------------------------------------------------------------------------------------------------------------------------------------------------------------------------------------------------------------------------------------------|--|--------------------------------------------------------------------------|--------------------------------------------------------------------------------------------------------------------------------------------------------------------------------------------------------|
| Quintás et al., 2021 [93] | Different drugs                                                                                       | Serum | International criteria of causality. ALT and ALP levels | ALT, ALP, AST, GGT, T. Bilirubin, Albumin, Tryglicerides, Cholesterol, Glucose, Creatinine                          | 79  | UPLC-MS/MS |                                                                                                                                                                                                                                                                       |  | Bile acids, amino acids, glycerophosphocholines and steroidal glycosides | Diagnosis. Identification of a metabolic fingerprint characteristic of distinct DILI phenotypes and DILI-recovered phenotype                                                                           |
| Xie et al., 2021 [94]     | Polygonum Multiflorum, Fructus Psoraleae, Anti-tuberculosis, cephalosporin, Azithromycin, Amoxicillin | Serum | Clinical evaluation                                     | White blood cells, albumin, ALT, AST, total bile acid, ALP, GGT, T. Bilirubin, TG, Cholesterol, HDL, LDL, VLDL, INR | 192 | UPLC-MS/MS | DILI vs healthy controls: 12-ketoLCA, bUDCA, DCA, GCA, GCDCA, NorCA, TCA, TCDCa. Severe vs moderate DILI: GCDCA, TCDCa and NorCA.                                                                                                                                     |  | Bile acids metabolism                                                    | Diagnosis. Identification of bile acids that can predict DILI and its severity                                                                                                                         |
| Sonn et al., 2022 [76]    | APAP                                                                                                  | Serum | ALT >60 IU/L                                            | ALT, ALP, AST, INR, Total protein, albumin, Total and direct bilirubin, tryglicerides                               | 204 | UHPLC-MS   | Diagnosis: Glycine, 5-oxoproline, 5-l-glutamyl-L-glutamine, L-citrulline higher in subjects that develop ALT elevations. Predictive biomarkers: At time 0, patients that will suffer from ALT elevation have higher levels of Ornithine, Allantoate and Nicotinamide. |  | Glutathione metabolism and Urea Cycle                                    | Predictive and diagnosis. Identification of predictive biomarkers in pre-treatment samples that are predictive of subjects who will develop transient ALT elevation and subsequent hepatic adaptation. |

**Table S1. Studies exploring DILI biomarkers by metabolomics approaches.** APAP= Acetaminophen, VPA= valproate, ALT= alanine aminotransferase, UNL= upper normal limit, CT= computed tomography, MRI= magnetic resonance imaging, PT= prothrombin time, T. Bilirubin= Total bilirubin, ALP= Alkaline phosphatase, GTP= Guanosine Triphosphate, AFP= Alpha Fetoprotein, PIVKA-II= Protein induced by vitamin K absence-II, AST= Aspartate aminotransferase, LDH= lactate dehydrogenase, INR= International Normalized Ratio, GGT= gamma-glutamyl transferase, TG= tryglyceride, HDL= High density lipoprotein, LDL= Low density lipoprotein,

VLDL= Very low density lipoprotein, TCA= Taurocholic acid, GCA= Glycocholic acid, GCDCA= Glycochenodeoxycholic acid,, TCDCA= Taurochenodeoxycholic acid, TDCA= Taurodeoxycholic acid, GDCA= Glycodeoxycholic acid, TUDCA= Tauroursodeoxycholic acid, GCDCS= Glycochenodeoxycholic sulfate, CA= Cholic acid, 12-ketoLCA= 12-ketolithocholic acid, bUDCA= ursodeoxycholic acid, DCA= Deoxycholic acid, NorCA= Norcholic acid, CDCA= Chenodeoxycholic acid, LCA= Lithocholic acid, SM= Sphingomyelin, Cer= Ceramide, GM3= monosialodihexosylganglioside, PE=Phosphatidylethanolamine, PC= Phosphatidylcholine, LysoPC= Lysophosphatidylcholine, DG= Diglycerides, VLCFAs= Very low chain fatty acids, LPE= Lysophosphatidylethanolamine, PS= Phosphatidylserine, CoQ10= Coenzyme Q10, TCA= tricarboxylic acid cycle, NAC= N-acetylcysteine, AIH= autoimmune hepatitis, HVB= hepatitis virus B, , PM= Polygonum Multiflorum.
